# Supplementary material for: Anomalous quantum efficiency for photoconduction and its power dependence in metal oxide semiconductor nanowires
Source: Royal Society of Chemistry journal article supplement (doi:10.1039/c3nr01635h), 2013-01-01
Supplement: c3nr01635h.pdf [file c3nr01635h.pdf]

## Supplemental Materials

### **Anomalous Quantum Efficiency for Photoconduction and Its Power Dependence in Metal Oxide Semiconductor Nanowires**

R. S. Chen<sup>1,\*</sup>, W. C. Wang<sup>2</sup>, M. L. Lu<sup>3</sup>, Y. F. Chen<sup>3</sup>, H. C. Lin<sup>4</sup>, K. H. Chen<sup>4,5</sup>, L. C. Chen<sup>5</sup>

<sup>1</sup>Graduate Institute of Applied Science and Technology, National Taiwan University of Science and Technology, Taipei 10607, Taiwan

<sup>2</sup>Department of Electronic Engineering, National Taiwan University of Science and Technology, Taipei 10607, Taiwan

<sup>3</sup>Department of Physics, National Taiwan University, Taipei 10617, Taiwan

<sup>4</sup>Institute of Atomic and Molecular Sciences, Academia Sinica, Taipei 10617, Taiwan

<sup>5</sup>Center for Condensed Matter Sciences, National Taiwan University, Taipei 10617, Taiwan

\*Email: [rsc@mail.ntust.edu.tw](mailto:rsc@mail.ntust.edu.tw)

## Table SI, R. S. Chen *et al*

**Table I.** The experimental parameters including NW diameter ( $d$ ), interdistance between two metal contact ( $l$ ), applied bias ( $V$ ), excitation photon energy ( $E$ ), and light intensity ( $I$ ) for the photoconductivity measurements of the different single-NW devices. The measured photocurrent ( $i_p$ ) values of the SnO<sub>2</sub>, TiO<sub>2</sub>, and WO<sub>3</sub> NWs under the corresponding  $I$  ranges used for the normalized gain ( $\Gamma_n$ ) calculations are also listed. The  $\Gamma_n$  value of the ZnO NW is estimated according to the  $i_p$  or  $\Gamma$  data in the Refs. 7.

| Nanowire Material | $d$ (nm) | $l$ ( $\mu\text{m}$ ) | $V$ (V) | $E$ (eV) | $I$ ( $\text{Wm}^{-2}$ ) | $i_p$ (nA) |
|-------------------|----------|-----------------------|---------|----------|--------------------------|------------|
| SnO <sub>2</sub>  | 280±10   | 2.9                   | 0.1     | 3.82     | 0.02–510                 | 650–1990   |
| TiO <sub>2</sub>  | 300±30   | 4                     | 0.1     | 3.82     | 0.01–510                 | 4.1–9.3    |
| WO <sub>3</sub>   | 255±20   | 2.4                   | 0.1     | 3.82     | 51–760                   | 1.2–22     |
| ZnO <sup>a</sup>  | 225±75   | 2                     | 5       | 3.18     | 0.062–410                | –          |

a) Ref. 7

## Table SII, R. S. Chen *et al*

**Table SI**, The adopted parameters including the optical absorption coefficient ( $\alpha$ ), optical reflectivity ( $R_o$ ), effective mass of electron ( $m_e^*$ ) and hole ( $m_h^*$ ), and energy bandgap ( $E_g$ ) of the SnO<sub>2</sub>, TiO<sub>2</sub>, WO<sub>3</sub>, and ZnO for the effective quantum efficiency ( $\eta_{\text{eff}}$ ) and the surface depletion width ( $w$ ) calculations. The  $\alpha$  and  $R_o$  values are corresponding to the photon energy ( $E$ ) in the table. D: direct bandgap ; I: indirect band gap.

| Nanowire Material | $E$ (eV) | $\alpha$ (cm <sup>-1</sup> )       | $R_o$                   | $m_e^*$ ( $\times m_o$ )   | $m_h^*$ ( $\times m_o$ )   | $E_g$ (eV)         | D/I |
|-------------------|----------|------------------------------------|-------------------------|----------------------------|----------------------------|--------------------|-----|
| SnO <sub>2</sub>  | 3.82     | $\sim 1.5 \times 10^{5\text{a,b}}$ | $\sim 0.2^{\text{a}}$   | 0.28 <sup>l</sup>          | 0.25 <sup>m</sup>          | 3.6 <sup>r</sup>   | D   |
| TiO <sub>2</sub>  | 3.82     | $\sim 2 \times 10^{5\text{c,d}}$   | $\sim 0.23^{\text{i}}$  | 9 <sup>n</sup>             | 2 <sup>n</sup>             | 3.0 <sup>s</sup>   | I   |
| WO <sub>3</sub>   | 3.82     | $\sim 2 \times 10^{5\text{e,f}}$   | $\sim 0.2^{\text{e}}$   | 2.4 $\pm$ 0.9 <sup>o</sup> | 2.4 $\pm$ 0.9 <sup>p</sup> | 3.0 <sup>e,f</sup> | I   |
| ZnO               | 3.18     | $\sim 1.5 \times 10^{5\text{g,h}}$ | $\sim 0.2^{\text{j,k}}$ | 0.24 <sup>q</sup>          | 0.45 <sup>q</sup>          | 3.3 <sup>t</sup>   | D   |

- a) Z. Nabi, A. Kellou, S. Mecabih, A. Khalfi, N. Benosman, *Mater. Sci. Engineer. B* **2003**, 98, 104.
- b) E. Kh. Shokr, M. M. Wakkad, H. M. A. Abd El-Ghanny, *J. Phys. Chem. Solid* **2000**, 61, 75.
- c) C. C. Ting, S. Y. Chen, D. M. Liu, *J. Appl. Phys.* **2000**, 88, 4628.
- d) J. D. DeLoach, G. Scarel, C. R. Aita, *J. Appl. Phys.* **1999**, 85, 2377.
- e) M. G. Hutchins, O. Abu-Alkhair, M. M. El-Nahass, K. A. El-Hady, *Mater. Chem. Phys.* **2006**, 98, 401.
- f) K. J. Patel, C. J. Panchal, V. A. Kheraj, M. S. Desai, *Mater. Chem. Phys.* **2009**, 114, 475.
- g) J. F. Muth, R. M. Kolbas, A. K. Sharma, S. Oktyabrsky, J. Narayan, *J. Appl. Phys.* **1999**, 85, 7884.
- h) P. L. Washington, H. C. Ong, J. Y. Dai, R. P. H. Chang, *Appl. Phys. Lett.* **1998**, 72, 3261.
- i) B. Karunakaran, R. T. Rajendra Kumar, C. Viswanathan, D. Mangalaraj, Sa. K. Narayandass, G. Mohan Rao, *Cryst. Res. Technol.* **2003**, 38, 773.
- j) R. L. Hengehold, R. J. Almassy, F. L. Pedrotti, *Phys. Rev. B* **1970**, 1, 4784.
- k) J. L. Freeouf, *Phys. Rev. B* **1973**, 7, 3810.
- l) K. J. Button, C. G. Fonstad, W. Dreybrodt, *Phys. Rev. B* **1971**, 4, 4539.
- m) E. Shanthi, A. Dutta, A. Banerjee, K. L. Chopra, *J. Appl. Phys.* **1980**, 51, 6243.
- n) C. Kormann, D. W. Bahnemann, M. R. Hoffmann, *J. Phys. Chem.* **1988**, 92, 5196.

- o) J. M. Berak, M. J. Sienko, *J. Solid State Chem.* **1970**, *2*, 109.
- p) The  $m_h^*$  was assumed equal to  $m_e^*$ , i.e. the same effective density of states of conduction band and valence band, for the  $\text{WO}_3$  crystals.
- q) L. E. Brus, *J. Chem. Phys.* **1984**, *80*, 4403.
- r) M. Batzill, U. Diebold, *Prog. Surf. Sci.* **2005**, *79*, 47.
- s) U. Diebold, *Surf. Sci. Rep.* **2003**, *48*, 53.
- t) S. M. Sze, *Semiconductor Devices: Physics and Technology*, 2<sup>nd</sup> edition (John Wiley & Son, Inc., New Jersey, **2002**).

**Figure S1,** R. S. Chen *et al*

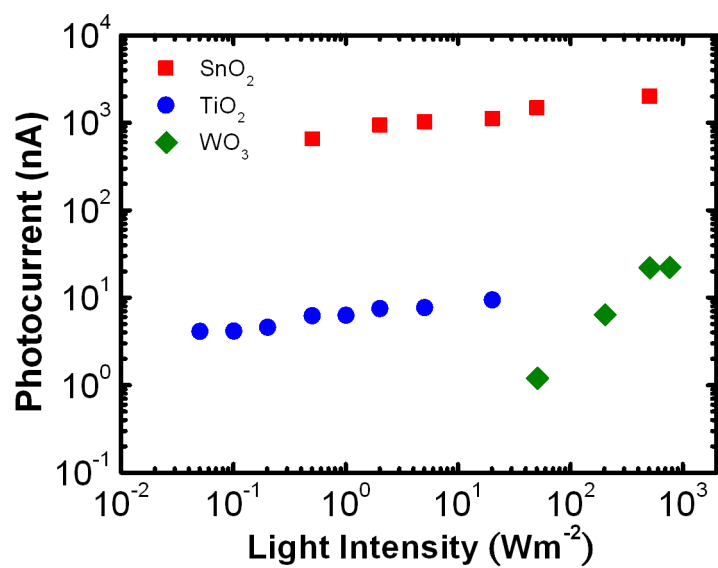

**Figure S1.** The photocurrent versus light intensity curves used for the normalized gain calculation for the single SnO<sub>2</sub>, TiO<sub>2</sub>, and WO<sub>3</sub> NWs under the excitation energy of 3.82 eV.

**Figure S2,** R. S. Chen *et al*

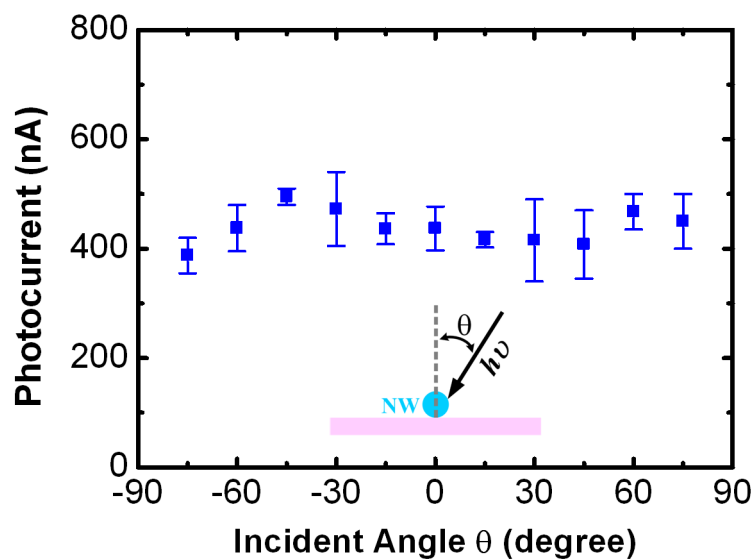

**Figure S2.** The typical photocurrent versus incident angle ( $\theta$ ) of laser beam from the normal for a single SnO<sub>2</sub> NW at  $E = 3.82$  eV. The inset shows the schematic of the angle-dependent photocurrent measurement for a single NW.

**Figure S3,** R. S. Chen *et al*

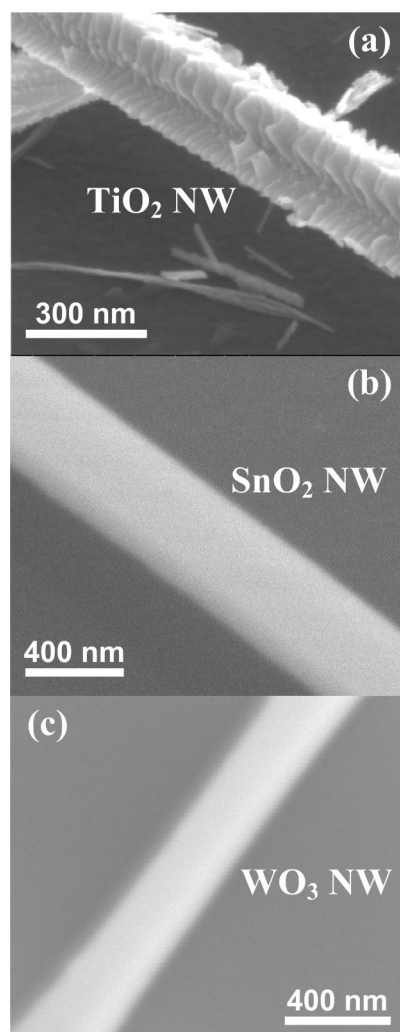

**Figure S3.** Typical FESEM images of the individual NWs of (a) TiO<sub>2</sub>, (b) SnO<sub>2</sub>, and (c) WO<sub>3</sub>.
